# Supplementary material for: The hookah series part 1: total metal analysis in hookah tobacco (narghile, shisha) – an initial study
Source: Royal Society of Chemistry journal article supplement (doi:10.1039/c2ay26065d), 2012-01-01
Supplement: c2ay26065d.pdf [file c2ay26065d.pdf]

The Hookah Series Part 1: Total Metal Analysis in  
Hookah Tobacco (Narghile, Shisha) – an Initial Study  
by  
R. Saadawi, J. Landero Figueroa, T. Hanley, J. Caruso

***Supplementary information***

| Element | Certified value | SD    | Determined | SD*   |
|---------|-----------------|-------|------------|-------|
| Na      | 136             | 4     | 133        | 5     |
| Al      | 598             | 12    | 609        | 16    |
| V       | 0.835           | 0.01  | 0.840      | 0.05  |
| Cr      | 1.99            | 0.06  | 2.02       | 0.08  |
| Mn      | 246             | 8     | 250        | 12    |
| Fe      | 3.68            | 7     | 3.72       | 9     |
| Co      | 0.57            | 0.02  | 0.61       | 0.06  |
| Ni      | 1.59            | 0.07  | 1.62       | 0.08  |
| Cu      | 4.70            | 0.14  | 4.90       | 0.18  |
| Zn      | 30.9            | 0.7   | 40.2       | 0.8   |
| Se      | 0.054           | 0.003 | 0.060      | 0.008 |
| As      | 0.112           | 0.004 | 0.116      | 0.012 |
| Sb      | 0.063           | 0.006 | 0.065      | 0.009 |
| Cd      | 1.52            | 0.04  | 1.55       | 0.07  |

\* n = 4

**Supplementary Table 1.** Results of the total elemental analysis performed on the standard reference material NIST 1573a, tomato leaves. Reported values with standard deviation.

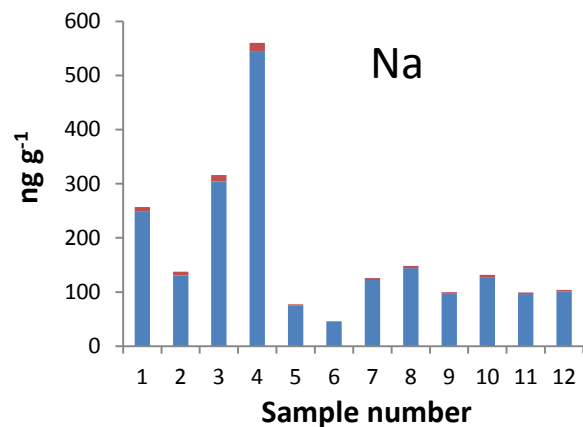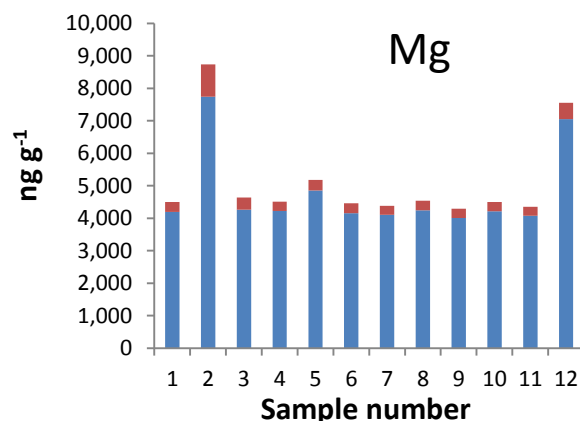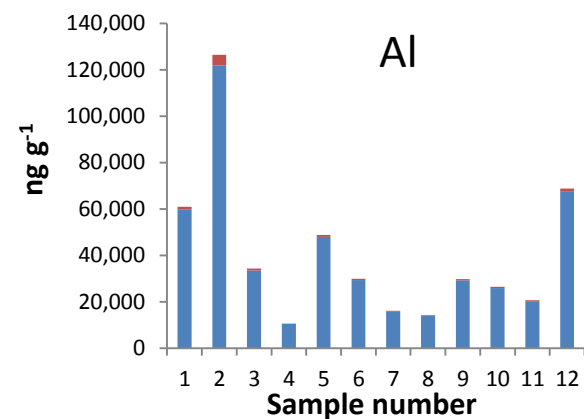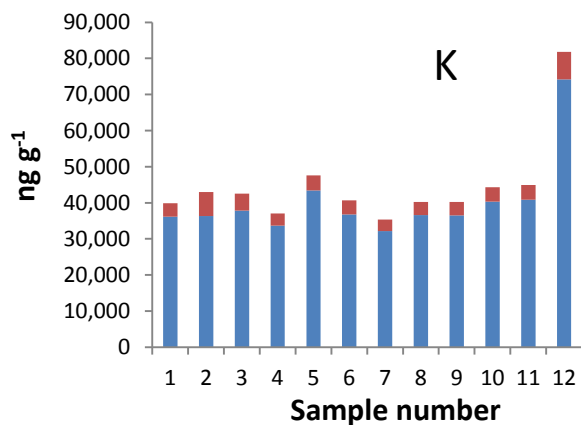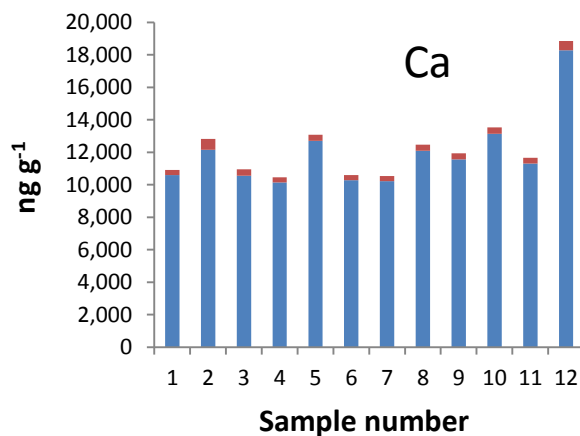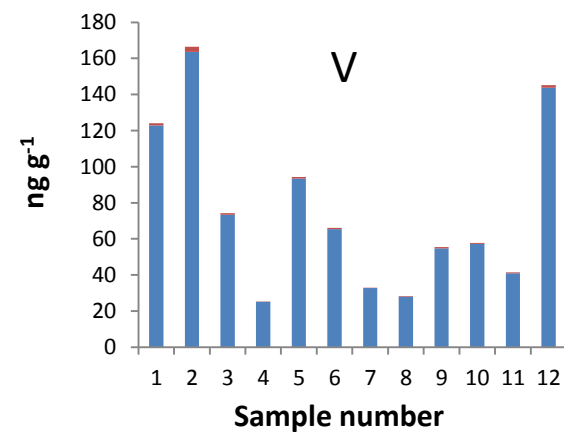

**Supplementary Figure 1 (S1a).** Bar graph representation of the results from total metal analysis of the twelve hookah samples, on blue is represented the contribution of the tobacco leaves, after the hot water extraction, and in red the contribution of the extracted part.

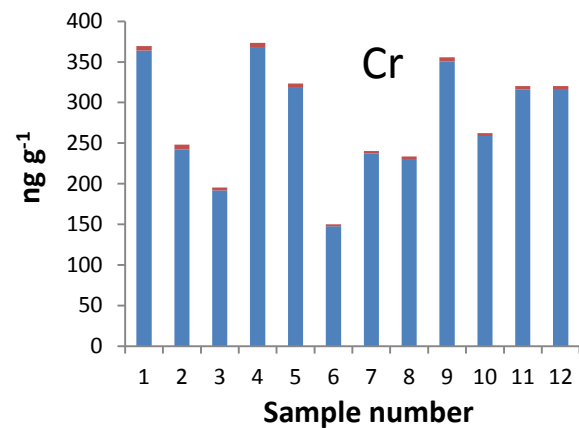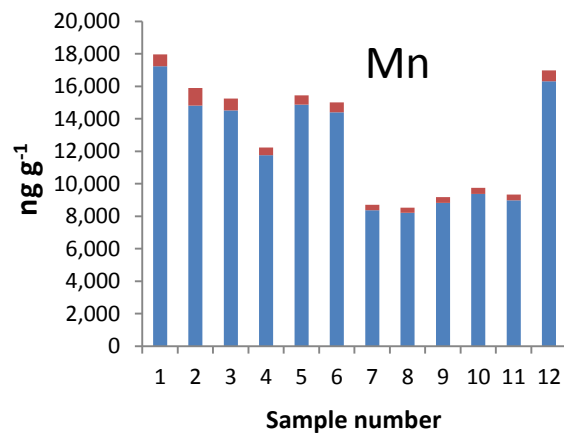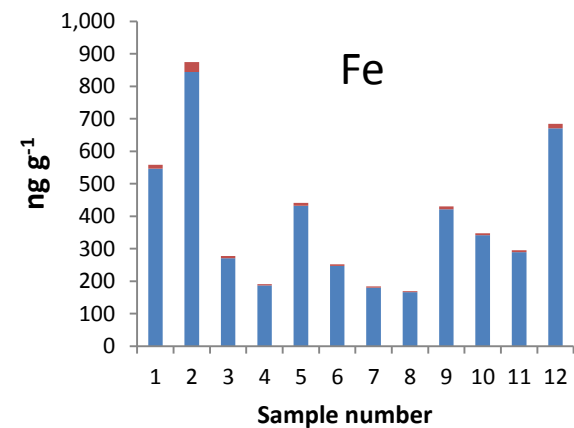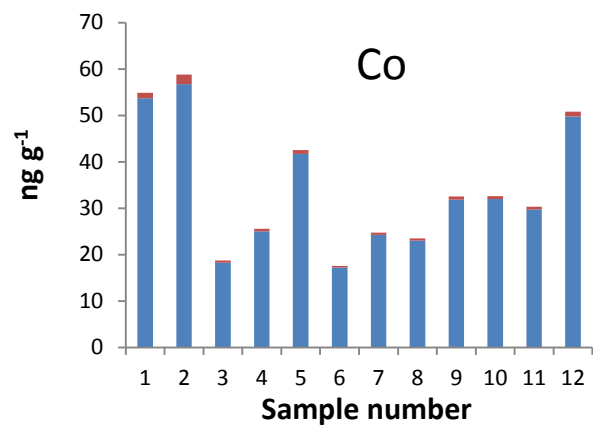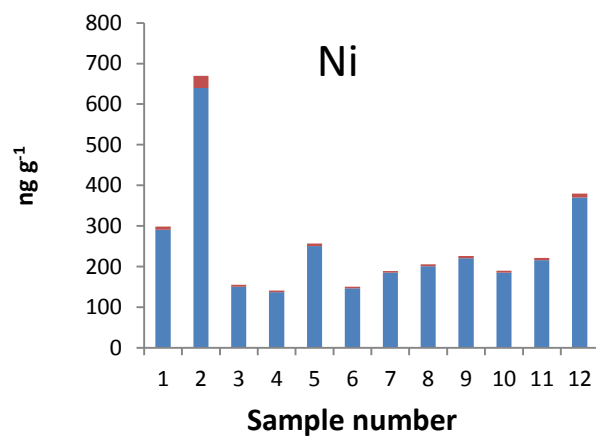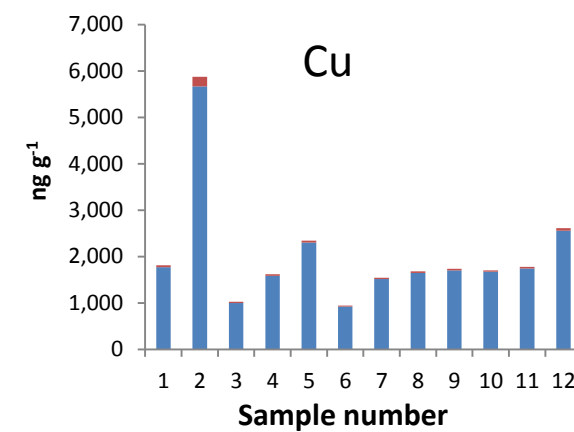

**Supplementary Figure 1 (S1b).** Bar graph representation of the results from total metal analysis of the twelve hookah samples, on blue is represented the contribution of the tobacco leaves, after the hot water extraction, and in red the contribution of the extracted part.

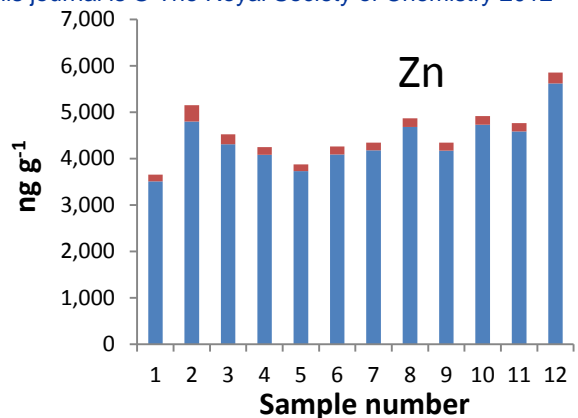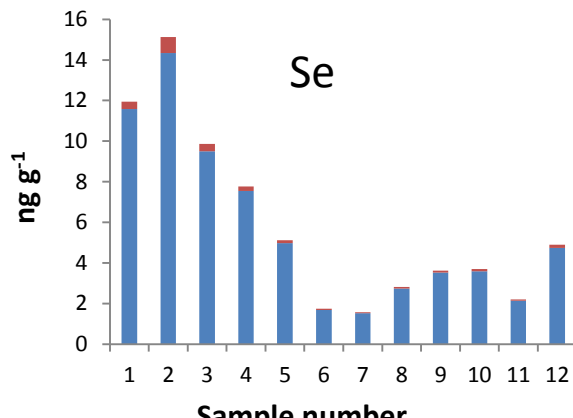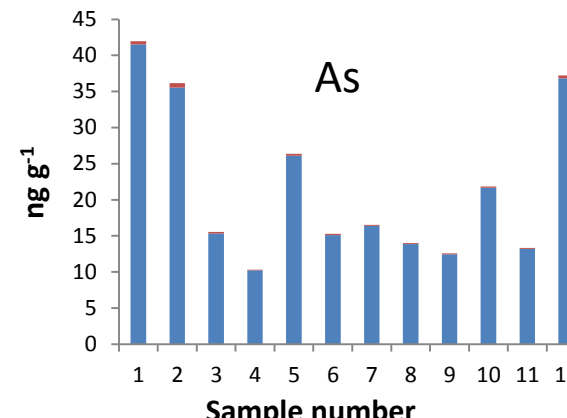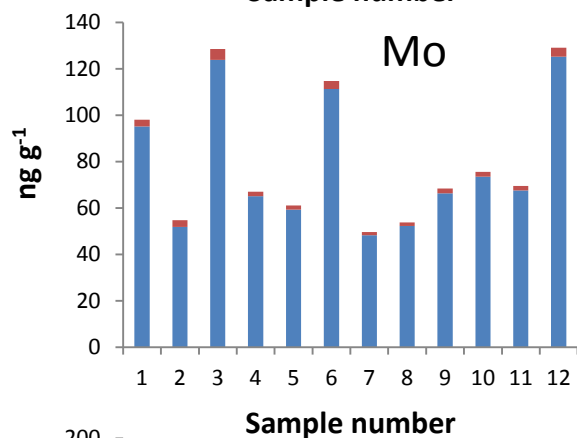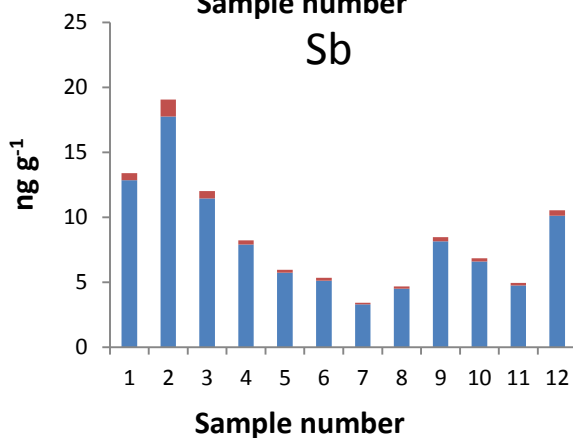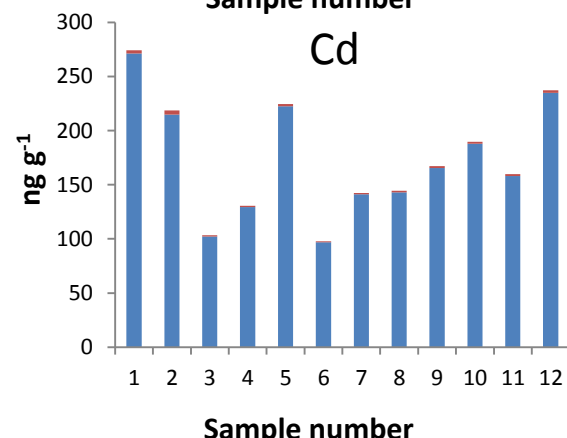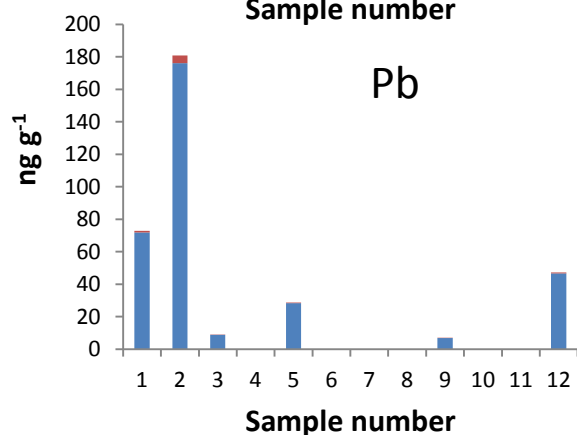

**Supplementary Figure 1 (S1c).** Bar graph representation of the results from total metal analysis of the twelve hookah samples: blue represents the contribution of the tobacco leaves, after the hot water extraction, and red the contribution from the extract.
